# Supplementary material for: Construction of PANI–cellulose composite fibers with good antistatic properties
Source: Royal Society of Chemistry journal article supplement (doi:10.1039/c4ta01149j), 2014-01-01
Supplement: c4ta01149j1.pdf [file c4ta01149j1.pdf]

**Electronic Supplementary Information**

**Construction of PANI/cellulose Composite Fibers with Good  
Antistatic Properties**

*Xingwei Shi<sup>a</sup>, Yanli Hu<sup>a</sup>, Feiya Fu<sup>a</sup>, Jinping Zhou<sup>a</sup>, Yixiang Wang<sup>b</sup>, Lingyun Chen<sup>b</sup>, Hongming Zhang<sup>c</sup>,  
Ji Li<sup>c</sup>, Xianhong Wang<sup>c</sup>, Lina Zhang<sup>a</sup> \**

*<sup>a</sup>Department of Chemistry, Wuhan University 430072, China*

*E-mail: [zhangln@whu.edu.cn](mailto:zhangln@whu.edu.cn)*

*<sup>b</sup>Department of Agricultural, Food and Nutritional Science, University of Alberta, Edmonton, Canada*

*T6G 2P5*

*<sup>c</sup>Key Lab of Polymer Ecomaterials, Chinese Academy of Sciences, Changchun Institute of Applied  
Chemistry, 130022, China*

---

\* To whom correspondence should be addressed. Phone: +86-27-87219274.

Fax: +86-27-68754067. E-mail: [zhangln@whu.edu.cn](mailto:zhangln@whu.edu.cn); [linazhangwhu@gmail.com](mailto:linazhangwhu@gmail.com) (L. Zhang).

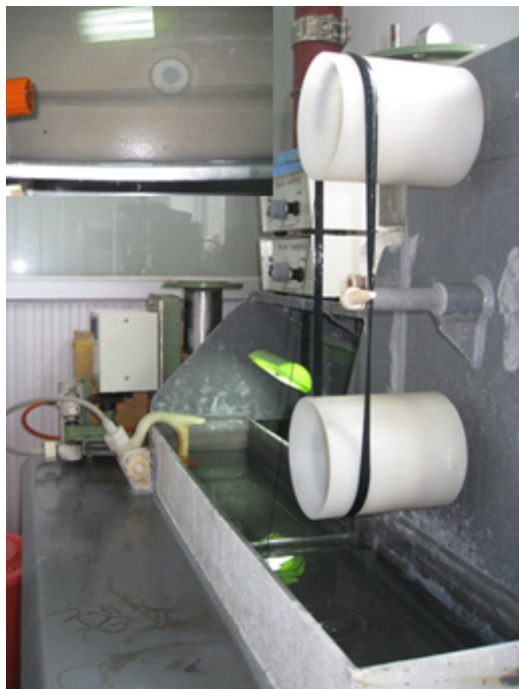

**Fig. S1** Photographs of fiber spinning from PANI/cellulose solution via a simplified laboratory spinning frame.

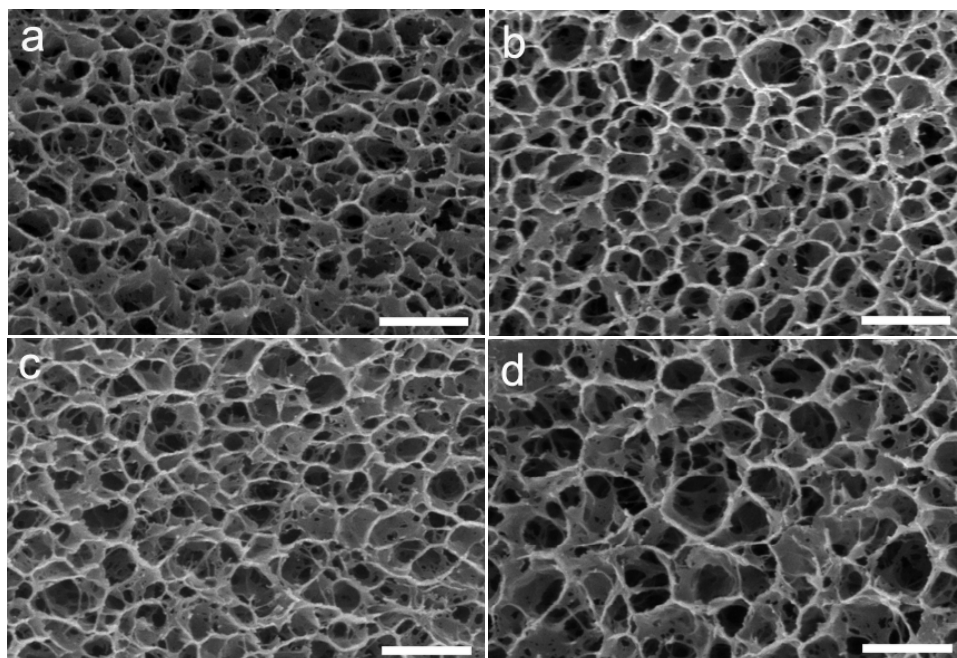

**Fig. S2** SEM images of cross-section for PC04 (a), PC08 (b), PC15 (c) and PC25 (d) PANI/cellulose fibers in the drawing ratio of -0.54. Scale bar is 1 μm.

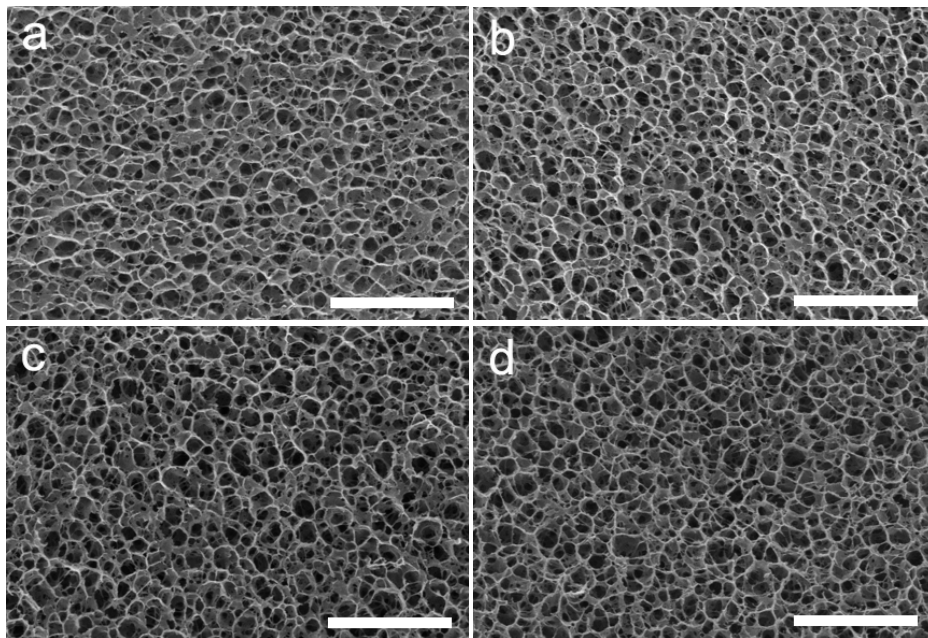

**Fig. S3** SEM images of cross-section for the PC15 PANI/cellulose fibers at different drawing ratio: (a) - 0.54, (b) -0.46, (c) -0.39, (d) -0.31. Scale bar is 2  $\mu\text{m}$ .

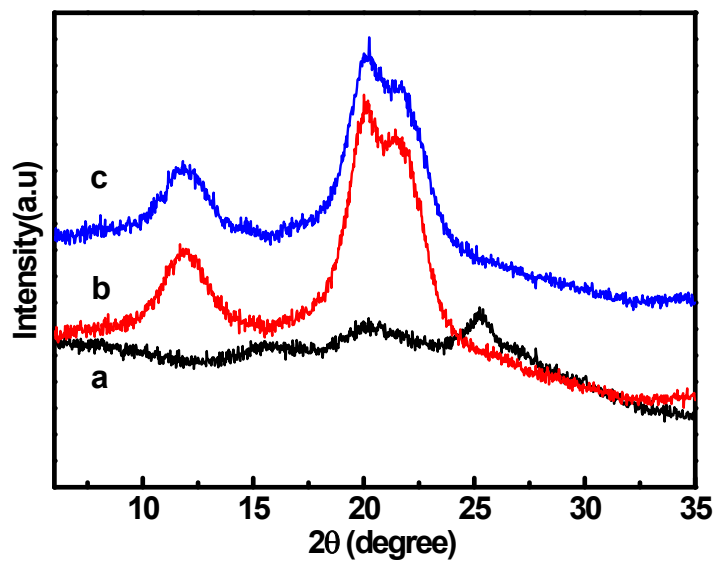

**Fig. S4** XRD patterns of the PANI powder (a), regenerated cellulose filament fibers (b), and PANI/ cellulose composite filament fibers (c).

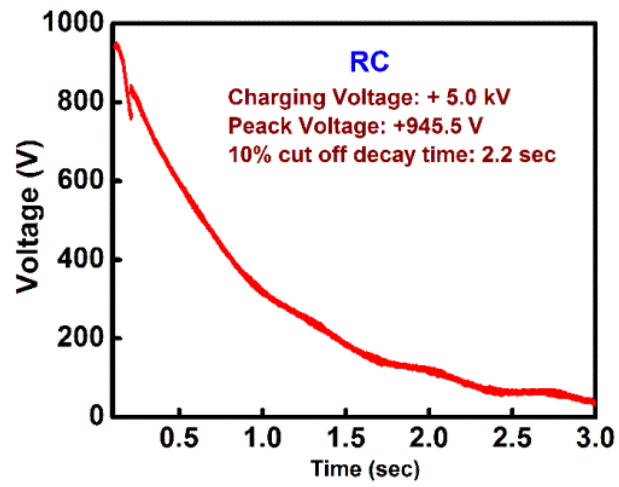

**Fig. S5** Static decay curves of RC cellulose fabric for the static charge dissipation test.
